# Supplementary material for: Access to Water and Sanitation Infrastructures for Primary Schoolchildren in the South-Central Part of Côte d’Ivoire
Source: MDPI journal article supplement (doi:10.3390/ijerph18168863), 2021-08-23
Supplement: s1 [file s1]

## BASELINE SURVEYS IN TAABO –SUDAC/COFER WASH/CSRS PROJECT

**Titre :** Water, sanitation and hygiene in primary schools in Taabo, Côte d'Ivoire : Assessment of infrastructures, knowledge and practices of management

| 1. Questionnaire Information (to be filled by the surveyor) |                                                                 |                                                                                                                                           |               |  |  |  |      |            |
|-------------------------------------------------------------|-----------------------------------------------------------------|-------------------------------------------------------------------------------------------------------------------------------------------|---------------|--|--|--|------|------------|
| 1.1                                                         | Survey conducted by :                                           | Name : _____                                                                                                                              |               |  |  |  |      |            |
| 1.2                                                         | Survey start time :                                             |                                                                                                                                           |               |  |  |  |      |            |
| 1.3                                                         | Date of today :                                                 | ___ / ___ / ___<br>Day Month Year                                                                                                         |               |  |  |  |      |            |
| 1.4                                                         | <i>Insert codes-ID of the respondent</i><br>Site<br>Individu(e) | <table border="1"> <tr> <td>Code<br/>- ID:</td> <td></td> <td></td> </tr> <tr> <td></td> <td>Site</td> <td>Individual</td> </tr> </table> | Code<br>- ID: |  |  |  | Site | Individual |
| Code<br>- ID:                                               |                                                                 |                                                                                                                                           |               |  |  |  |      |            |
|                                                             | Site                                                            | Individual                                                                                                                                |               |  |  |  |      |            |
| 1.5                                                         | Did the child give consent ?                                    | <input type="checkbox"/> Yes <input type="checkbox"/><br><input type="checkbox"/> No <input type="checkbox"/> → <b>End of the survey</b>  |               |  |  |  |      |            |
| 1.6                                                         | If the interview is not possible, specify the reason            | _____                                                                                                                                     |               |  |  |  |      |            |

| 2. Demographic issues |                                     |                                                                                 |
|-----------------------|-------------------------------------|---------------------------------------------------------------------------------|
| 2.1                   | Educational level: What grade/year? | Classe : _____                                                                  |
| 2.3                   | Your sex :                          | <input type="checkbox"/> Male <input type="checkbox"/> Female                   |
| 2.4                   | What is your date of birth?         | ___ / ___ / ___<br>Day month year<br><br><input type="checkbox"/> I don't know. |
| 2.5                   | How old are you?                    | Age : _____<br><br><input type="checkbox"/> I don't know.                       |

| 3. Water, sanitation and hygiene (WASH) |                                                                                                                                                                                                                                                                                                                                                 |
|-----------------------------------------|-------------------------------------------------------------------------------------------------------------------------------------------------------------------------------------------------------------------------------------------------------------------------------------------------------------------------------------------------|
| A. PRACTICES / BEHAVIOUR (WASH)         |                                                                                                                                                                                                                                                                                                                                                 |
| 4.1                                     | <b>When do you wash your hands with soap (detergent)?</b> <i>(Several answers possible)</i><br><input type="checkbox"/> Befor eating <input type="checkbox"/> Don't wash my hands<br><input type="checkbox"/> After eating <input type="checkbox"/> I don't know<br><input type="checkbox"/> After playing <input type="checkbox"/> No response |

|       |                                                                                                                                                                                                                                                                                                                                                                                                                                                                                                                                                                                                                                                                                                                                                                   |
|-------|-------------------------------------------------------------------------------------------------------------------------------------------------------------------------------------------------------------------------------------------------------------------------------------------------------------------------------------------------------------------------------------------------------------------------------------------------------------------------------------------------------------------------------------------------------------------------------------------------------------------------------------------------------------------------------------------------------------------------------------------------------------------|
|       | <input type="checkbox"/> After defecation<br><input type="checkbox"/> Other : _____                                                                                                                                                                                                                                                                                                                                                                                                                                                                                                                                                                                                                                                                               |
| 4.2   | <b>Pourquoi tu te laves les mains ?</b><br>_____                                                                                                                                                                                                                                                                                                                                                                                                                                                                                                                                                                                                                                                                                                                  |
| 4.3   | <b>What do you usually use to wash your hands? (Several answers possible)</b><br><input type="checkbox"/> Water <input type="checkbox"/> Autre : _____<br><input type="checkbox"/> The ash <input type="checkbox"/> I don't know<br><input type="checkbox"/> Mud <input type="checkbox"/> No response<br><input type="checkbox"/> Water with soap                                                                                                                                                                                                                                                                                                                                                                                                                 |
| 4.4   | <b>When should you wash your hands with soap (detergent)? (Several answers possible)</b><br><input type="checkbox"/> Before eating <input type="checkbox"/> Don't wash my hands<br><input type="checkbox"/> After eating <input type="checkbox"/> I don't know<br><input type="checkbox"/> After playing <input type="checkbox"/> No response<br><input type="checkbox"/> After defecation<br><input type="checkbox"/> Other : _____                                                                                                                                                                                                                                                                                                                              |
| 4.5   | <b>Do you drink the water provided at school?</b><br><input type="checkbox"/> Yes, drilling <input type="checkbox"/> No<br><input type="checkbox"/> Yes, from the filter <input type="checkbox"/> Other : _____<br><input type="checkbox"/> Yes, from the well <input type="checkbox"/> I don't know<br><input type="checkbox"/> Yes, from the tap <input type="checkbox"/> No response                                                                                                                                                                                                                                                                                                                                                                           |
| 4.6   | <b>Do you bring drinking water from home to school?</b><br><input type="checkbox"/> Yes <input type="checkbox"/> Other : _____<br><input type="checkbox"/> No <input type="checkbox"/> I don't know<br><input type="checkbox"/> No response                                                                                                                                                                                                                                                                                                                                                                                                                                                                                                                       |
| 4.7   | <b>The drinking water you brought today, where does it come from?</b><br><input type="checkbox"/> Not brought drinking water today<br><input type="checkbox"/> From home<br><input type="checkbox"/> At school<br><input type="checkbox"/> Other : _____                                                                                                                                                                                                                                                                                                                                                                                                                                                                                                          |
| 4.8   | <b>Do you usually ... in a river, a marsh, a lake?</b><br><div style="display: flex; justify-content: space-between;"> <div> <b>... play ?</b><br/> <b>... fish ?</b><br/> <b>... do the laundry?</b><br/> <b>... work ?</b> </div> <div> <input type="checkbox"/> Yes <input type="checkbox"/> No <input type="checkbox"/> No response<br/> <input type="checkbox"/> Yes <input type="checkbox"/> No <input type="checkbox"/> No response<br/> <input type="checkbox"/> Yes <input type="checkbox"/> No <input type="checkbox"/> No response<br/> <input type="checkbox"/> Yes <input type="checkbox"/> No <input type="checkbox"/> No response </div> <div>  </div> </div> |
| 4.9   | <b>Are there latrines at the school ?</b><br><input type="checkbox"/> Yes <input type="checkbox"/> I don't know<br><input type="checkbox"/> No → <i>continue to 4.13</i> <input type="checkbox"/> No response                                                                                                                                                                                                                                                                                                                                                                                                                                                                                                                                                     |
| 4.10a | <b>Are the latrines always open (not closed)?</b><br><input type="checkbox"/> Yes <input type="checkbox"/> I don't know<br><input type="checkbox"/> No <input type="checkbox"/> No response                                                                                                                                                                                                                                                                                                                                                                                                                                                                                                                                                                       |
| 4.10b | <b>Are the latrines clean / well cleaned?</b><br><input type="checkbox"/> Yes <input type="checkbox"/> I don't know<br><input type="checkbox"/> No <input type="checkbox"/> No response                                                                                                                                                                                                                                                                                                                                                                                                                                                                                                                                                                           |
| 4.11  | <b>Do you use the latrines at school?</b><br><input type="checkbox"/> Yes → <i>continue to 4.14</i> <input type="checkbox"/> I don't know<br><input type="checkbox"/> No <input type="checkbox"/> No response                                                                                                                                                                                                                                                                                                                                                                                                                                                                                                                                                     |

|                                      |                                                                                                                                                                                                                                                                                                                                                                                                                                                                                                                                                                                                                             |
|--------------------------------------|-----------------------------------------------------------------------------------------------------------------------------------------------------------------------------------------------------------------------------------------------------------------------------------------------------------------------------------------------------------------------------------------------------------------------------------------------------------------------------------------------------------------------------------------------------------------------------------------------------------------------------|
| 4.12                                 | <b>Why don't you use the latrine at school?</b><br><i>(Several answers possible)</i> <div style="display: flex; justify-content: space-between;"> <div> <input type="checkbox"/> Dirty<br/> <input type="checkbox"/> No water<br/> <input type="checkbox"/> No soap<br/> <input type="checkbox"/> Smell<br/> <input type="checkbox"/> Does not work </div> <div> <input type="checkbox"/> Not enough latrine facilities<br/> <input type="checkbox"/> No privacy<br/> <input type="checkbox"/> They are not clean/dirty<br/> <input type="checkbox"/> Other : _____<br/> <input type="checkbox"/> No response </div> </div> |
| 4.13                                 | <b>Where do you relieve yourself if you are in class/school?</b> <div style="display: flex; justify-content: space-between;"> <div> <input type="checkbox"/> In the bush<br/> <input type="checkbox"/> Behind the latrines<br/> <input type="checkbox"/> At the latrine </div> <div> <input type="checkbox"/> At home<br/> <input type="checkbox"/> Other : _____<br/> <input type="checkbox"/> No response </div> </div>                                                                                                                                                                                                   |
| <b>B. KNOWLEDGE / ATTITUDES WASH</b> |                                                                                                                                                                                                                                                                                                                                                                                                                                                                                                                                                                                                                             |
| 4.14a                                | <b>Can water cause disease?</b> <div style="display: flex; justify-content: space-between;"> <div> <input type="checkbox"/> Yes<br/> <input type="checkbox"/> No </div> <div> <input type="checkbox"/> I don't know<br/> <input type="checkbox"/> No response </div> </div>                                                                                                                                                                                                                                                                                                                                                 |
| 4.14b                                | <b>If you said yes à 14.4a, what are the water-related diseases?</b><br><i>(You can write down several answers)</i> <div style="display: flex; justify-content: space-between;"> <div> <hr/><hr/><hr/><hr/><hr/> </div> <div> <hr/><hr/><hr/><hr/><hr/> </div> </div>                                                                                                                                                                                                                                                                                                                                                       |
| 4.16                                 | <b>Do you think that if you don't wash your hands you might get sick, for example a stomach ache or diarrhoea?</b> <div style="display: flex; justify-content: space-between;"> <div> <input type="checkbox"/> Yes<br/> <input type="checkbox"/> No<br/> <input type="checkbox"/> Other : _____ </div> <div> <input type="checkbox"/> I don't know<br/> <input type="checkbox"/> No response </div> </div>                                                                                                                                                                                                                  |
